# Supplementary material for: Linking climate and air quality over Europe: effects of meteorology on PM 2.5 concentrations
Source: Copernicus journal article supplement (doi:10.5194/acp-14-10283-2014), 2014-09-29
Supplement: Supplementary file 1 [file acp-14-10283-2014-supplement.pdf]

Supplement of Atmos. Chem. Phys., 14, 10283–10298, 2014  
<http://www.atmos-chem-phys.net/14/10283/2014/>  
doi:10.5194/acp-14-10283-2014-supplement  
© Author(s) 2014. CC Attribution 3.0 License.

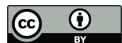

*Supplement of*

## **Linking climate and air quality over Europe: effects of meteorology on PM<sub>2.5</sub> concentrations**

**A. G. Megaritis et al.**

*Correspondence to:* S. N. Pandis ([spyros@chemeng.upatras.gr](mailto:spyros@chemeng.upatras.gr))

**Table S1.** Summary of expected effects on total PM<sub>2.5</sub> concentrations due to changes on meteorological parameters during the modelled summer, the modelled winter and the modelled fall period.

| Meteorological Parameter | Expected Change of Parameter | Process Affected             | Predicted Sensitivity Mean (10%, 90%)                   | Expected Concentration Change (ng m <sup>-3</sup> ) Mean (10%, 90%) |
|--------------------------|------------------------------|------------------------------|---------------------------------------------------------|---------------------------------------------------------------------|
| <b>Summer Period</b>     |                              |                              |                                                         |                                                                     |
| Temperature              | +1 - 5.5 K <sup>a</sup>      | BVOC emissions               | 10.2 ng m <sup>-3</sup> K <sup>-1</sup><br>(-13, 44)    | 10.2 to 56.1<br>(-71.5 to 242)                                      |
|                          |                              | Aerosol partitioning         | -49 ng m <sup>-3</sup> K <sup>-1</sup><br>(-142, 4.1)   | -49 to -270<br>(-781 to 23)                                         |
|                          |                              | Reaction rates               | 26.3 ng m <sup>-3</sup> K <sup>-1</sup><br>(-1.1, 49)   | 26 to 145<br>(-6.1 to 270)                                          |
|                          |                              | Overall                      | -23.3 ng m <sup>-3</sup> K <sup>-1</sup><br>(-145, 67)  | -23 to -128<br>(-797 to 369)                                        |
| Wind Speed               | -10 to 10% <sup>b</sup>      | Overall (constant emissions) | -41.3 ng m <sup>-3</sup> % <sup>-1</sup><br>(-109, 0.7) | -413 to 413<br>(-1090 to 1090)                                      |
|                          |                              | Sea salt emissions           | 39.2 ng m <sup>-3</sup><br>(-1.3, 107)                  | -392 to 392<br>(-1070 to 1070)                                      |
| Absolute humidity        | +5 to 40% <sup>c</sup>       | Overall                      | 8.2 ng m <sup>-3</sup> % <sup>-1</sup><br>(-13, 27)     | 41 to 330<br>(-520 to 1080)                                         |
| Precipitation rate       | -40 to +40% <sup>b</sup>     | Overall                      | -12.9 ng m <sup>-3</sup> % <sup>-1</sup><br>(-40, -1.6) | -516 to 516<br>(-1600 to 1600)                                      |
| Precipitation area       | -40 to +40% <sup>b</sup>     | Overall                      | -7.8 ng m <sup>-3</sup> % <sup>-1</sup><br>(-17, -1.1)  | -312 to 312<br>(-680 to 680)                                        |
| Mixing Height            | -20 to +20%                  | Overall                      | -3.5 ng m <sup>-3</sup> % <sup>-1</sup><br>(-9.5, 1)    | -70 to 70<br>(-190 to 190)                                          |

<sup>a</sup> IPCC, 2007

<sup>b</sup> Based on IPCC A2 scenario

<sup>c</sup> Based on IPCC temperature projections and predicted base-case average RH during the three modeled periods

**Table S1.** (continued)

| Meteorological Parameter | Expected Change of Parameter | Process Affected             | Predicted Sensitivity Mean (10%, 90%)                   | Expected Concentration Change (ng m <sup>-3</sup> ) Mean (10%, 90%) |
|--------------------------|------------------------------|------------------------------|---------------------------------------------------------|---------------------------------------------------------------------|
| <b>Winter Period</b>     |                              |                              |                                                         |                                                                     |
| Temperature              | +1 - 5.5 K <sup>a</sup>      | BVOC emissions               | 10 ng m <sup>-3</sup> K <sup>-1</sup><br>(-0.2, 23)     | 10 to 55<br>(-1.1 to 127)                                           |
|                          |                              | Aerosol partitioning         | -25 ng m <sup>-3</sup> K <sup>-1</sup><br>(-73, 13)     | -25 to -138<br>(-402 to 72)                                         |
|                          |                              | Reaction rates               | 13.3 ng m <sup>-3</sup> K <sup>-1</sup><br>(-1.1, 25)   | 13.3 to 73<br>(-6 to 138)                                           |
|                          |                              | Overall                      | -6.5 ng m <sup>-3</sup> K <sup>-1</sup><br>(-90, 65)    | -6.5 to -36<br>(-495 to 358)                                        |
| Wind Speed               | -10 to 10% <sup>b</sup>      | Overall (constant emissions) | -36.4 ng m <sup>-3</sup> % <sup>-1</sup><br>(-83, -4.4) | -364 to 364<br>(-830 to 830)                                        |
|                          |                              | Sea salt emissions           | 52.5 ng m <sup>-3</sup><br>(5, 132)                     | -525 to 525<br>(-1320 to 1320)                                      |
| Absolute humidity        | +5 to 40% <sup>c</sup>       | Overall                      | -7.6 ng m <sup>-3</sup> % <sup>-1</sup><br>(-35, 9)     | -38 to -304<br>(-1400 to 360)                                       |
| Precipitation rate       | -40 to +40% <sup>b</sup>     | Overall                      | -12.2 ng m <sup>-3</sup> % <sup>-1</sup><br>(-33, -1.6) | -488 to 488<br>(-1320 to 1320)                                      |
| Precipitation area       | -40 to +40% <sup>b</sup>     | Overall                      | -7.3 ng m <sup>-3</sup> % <sup>-1</sup><br>(-15, -1.5)  | -292 to 292<br>(-600 to 600)                                        |
| Mixing Height            | -20 to +20%                  | Overall                      | -1.8 ng m <sup>-3</sup> % <sup>-1</sup><br>(-5, 0.3)    | -36 to 36<br>(-100 to 100)                                          |

<sup>a</sup> IPCC, 2007<sup>b</sup> Based on IPCC A2 scenario<sup>c</sup> Based on IPCC temperature projections and predicted base-case average RH during the three modeled periods.

**Table S1.** (continued)

| Meteorological Parameter | Expected Change of Parameter | Process Affected             | Predicted Sensitivity Mean (10%, 90%)                   | Expected Concentration Change (ng m <sup>-3</sup> ) Mean (10%, 90%) |
|--------------------------|------------------------------|------------------------------|---------------------------------------------------------|---------------------------------------------------------------------|
| <b>Fall Period</b>       |                              |                              |                                                         |                                                                     |
| Temperature              | +1 - 5.5 K <sup>a</sup>      | BVOC emissions               | 20.3 ng m <sup>-3</sup> K <sup>-1</sup><br>(-1.4, 52)   | 20.3 to 112<br>(-7.7 to 286)                                        |
|                          |                              | Aerosol partitioning         | -88 ng m <sup>-3</sup> K <sup>-1</sup><br>(-285, 2.3)   | -88 to -484<br>(-1570 to 13)                                        |
|                          |                              | Reaction rates               | 47.1 ng m <sup>-3</sup> K <sup>-1</sup><br>(-0.1, 115)  | 47.1 to 259<br>(-0.6 to 633)                                        |
|                          |                              | Overall                      | -33 ng m <sup>-3</sup> K <sup>-1</sup><br>(-210, 85)    | -33 to -182<br>(-1156 to 468)                                       |
| Wind Speed               | -10 to 10% <sup>b</sup>      | Overall (constant emissions) | -38.3 ng m <sup>-3</sup> % <sup>-1</sup><br>(-115, 2)   | -383 to 383<br>(-1150 to 1150)                                      |
|                          |                              | Sea salt emissions           | 40 ng m <sup>-3</sup><br>(-1.9, 123)                    | -400 to 400<br>(-1230 to 1230)                                      |
| Absolute humidity        | +5 to 40% <sup>c</sup>       | Overall                      | 11.5 ng m <sup>-3</sup> % <sup>-1</sup><br>(-21, 57)    | 58 to 460<br>(-840 to 2280)                                         |
| Precipitation rate       | -40 to +40% <sup>b</sup>     | Overall                      | -17.7 ng m <sup>-3</sup> % <sup>-1</sup><br>(-43, -3)   | -708 to 708<br>(-1720 to 1720)                                      |
| Precipitation area       | -40 to +40% <sup>b</sup>     | Overall                      | -13.4 ng m <sup>-3</sup> % <sup>-1</sup><br>(-33, -3.3) | -536 to 536<br>(-1320 to 1320)                                      |
| Mixing Height            | -20 to +20%                  | Overall                      | -2.2 ng m <sup>-3</sup> % <sup>-1</sup><br>(-6.5, 1.1)  | -44 to 44<br>(-130 to 130)                                          |

<sup>a</sup> IPCC, 2007<sup>b</sup> Based on IPCC A2 scenario<sup>c</sup> Based on IPCC temperature projections and predicted base-case average RH during the three modeled periods.

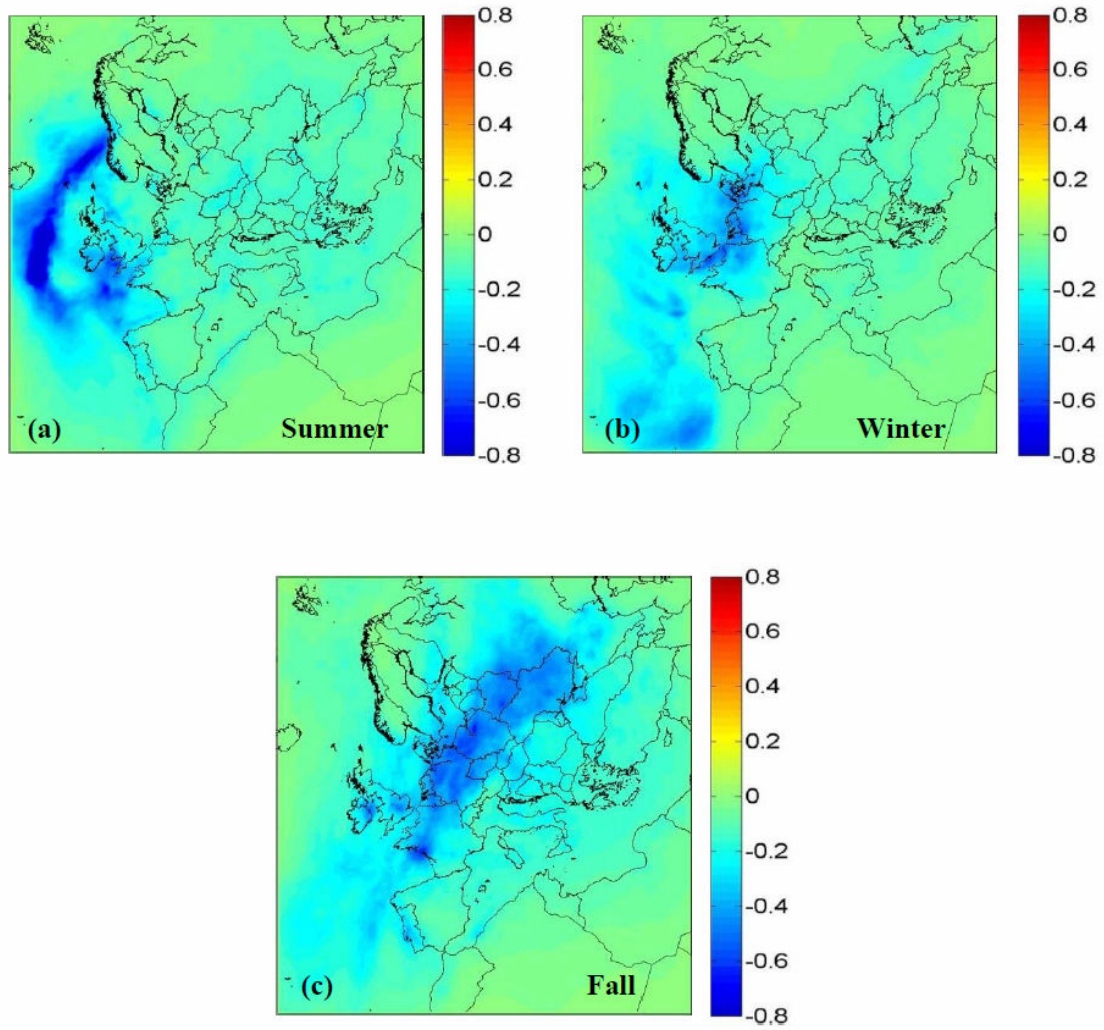

**Figure S1.** Predicted average change in ground-level concentrations ( $\mu\text{g m}^{-3}$ ) of total PM<sub>2.5</sub> due to a 10% increase in precipitation rate during the modeled (a) summer, (b) winter and (c) fall periods. A positive value corresponds to an increase.

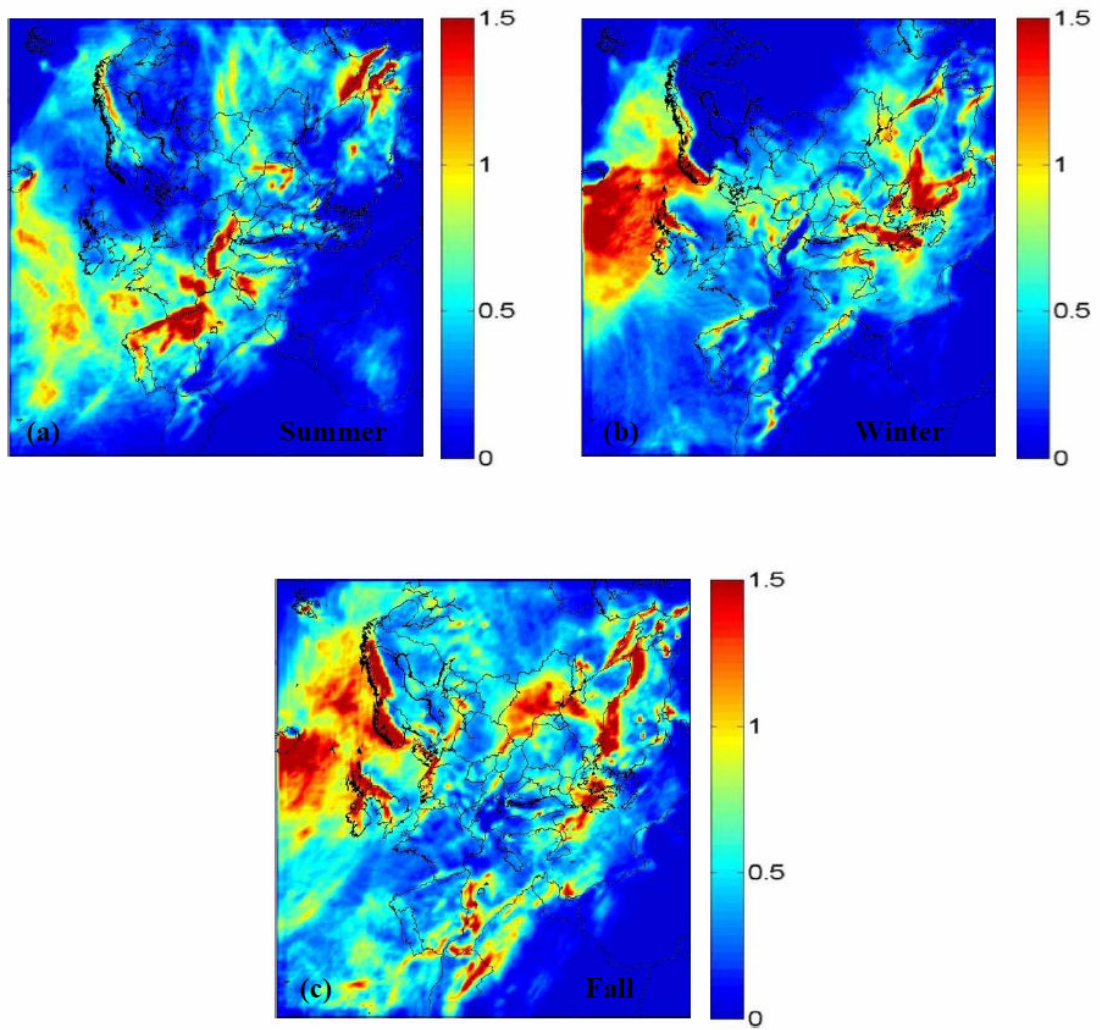

**Figure S2.** Predicted base case rainfall rate (mm month<sup>-1</sup>) during the modeled (a) summer, (b) winter and (c) fall periods.

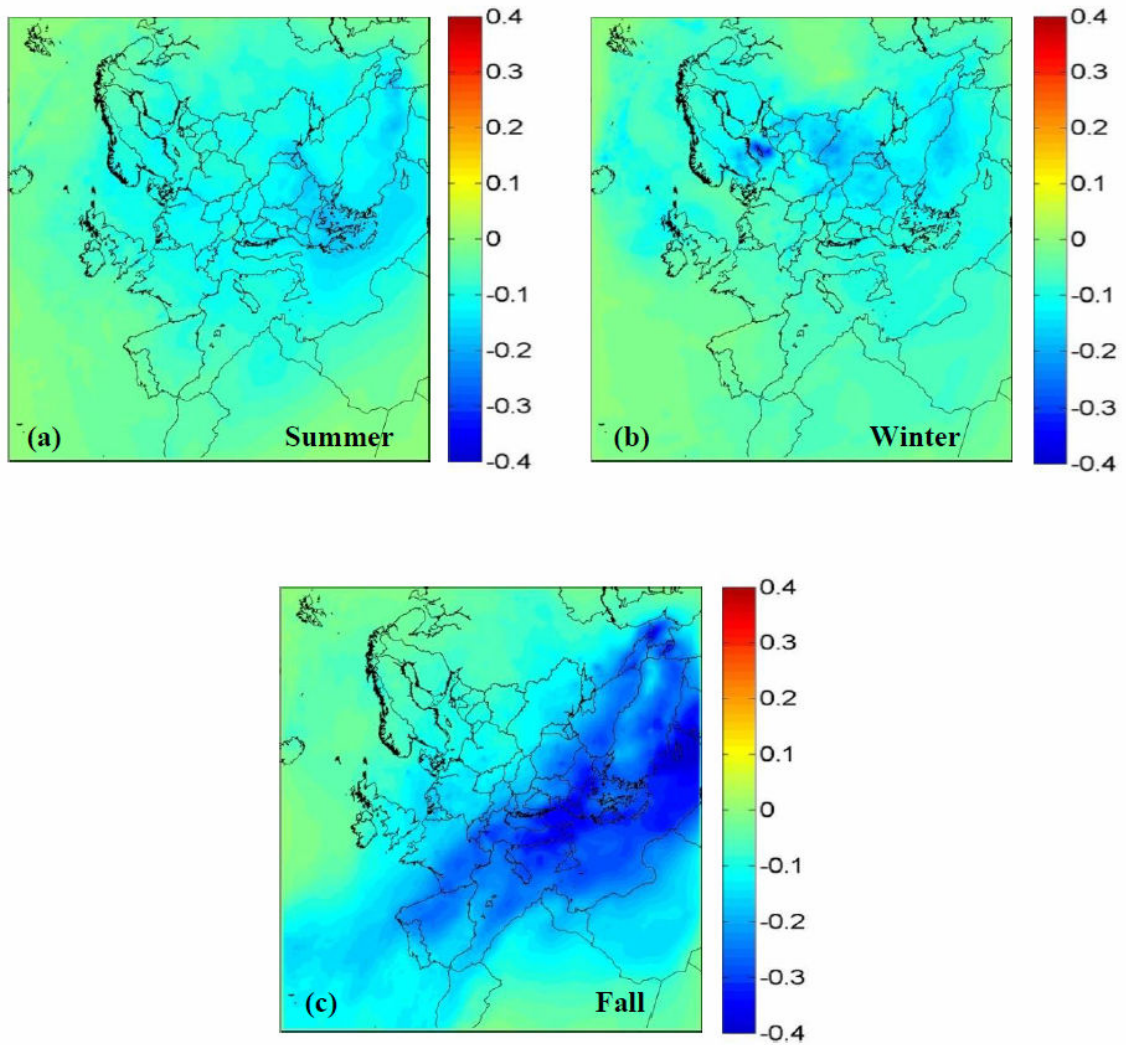

**Figure S3.** Predicted average change in ground-level concentrations ( $\mu\text{g m}^{-3}$ ) of total PM<sub>2.5</sub> due to a 10% increase in area undergoing precipitation during the modeled (a) summer, (b) winter and (c) fall periods. A positive value corresponds to an increase.



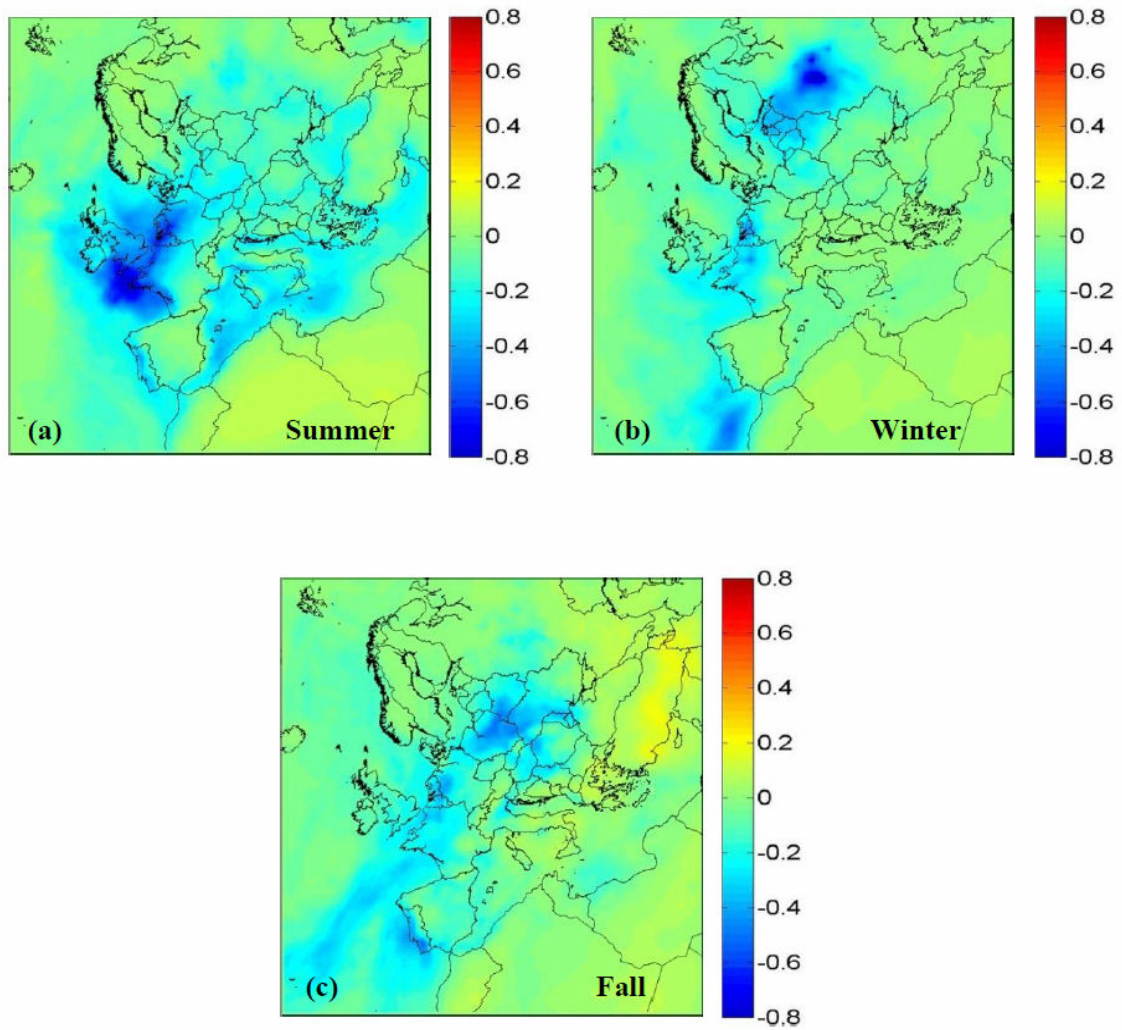

**Figure S4.** Predicted average change in ground-level concentrations ( $\mu\text{g m}^{-3}$ ) of total PM<sub>2.5</sub> due to an increase of mixing height by one model layer (approximately 150 m) during the modeled (a) summer, (b) winter and (c) fall periods. A positive value corresponds to an increase.
